# Supplementary material for: Targeted exome sequencing identified a novel USH2A mutation in a Chinese usher syndrome family: a case report
Source: BMC Ophthalmol. 2020 Dec 10;20:485. doi: 10.1186/s12886-020-01711-7 (PMC7727220; doi:10.1186/s12886-020-01711-7)
Supplement: Supplementary file 2 — Additional file 2: Table S2. The TES data of the proband. [file 12886_2020_1711_MOESM2_ESM.xlsx]

## Sheet: Sheet1
ABCA4	ADAMTSL4	ALMS1	ARMS2	BBS12	BLOC1S6	C5AR2	CAPN5
CEP290	CFI	CLRN1	COL11A1	CRX	CYP4V2	DTNBP1	ERCC8
FSCN2	GNB3	GUCA1B	HK1	HTRA1	IMPG2	KIAA1549	LRIT3
MAPKAPK3	MKS1	NDP	NRL	OPN1MW2	PCDH15	PDE6H	PEX16
PEX7	PNPLA6	PRPF31	RABGGTA	RD3	RIMS1	RPGR	SEMA4A
SLC25A15	SPATA7	TENM3	TMEM231	TRPM1	TUBGCP4	USH2A	YAP1
ABCB6	ADGRA3	ANO5	ASRGL1	BBS2	BMP4	C5orf42	CC2D2A
CEP41	CHM	CLUAP1	COL11A2	CSPP1	DHCR7	EFEMP1	EXOSC2
FXN	GNPTG	GUCY2D	HMCN1	IDH3B	INPP5E	KIF11	LRP5
MC1R	MLPH	NEK2	NYX	OPN1SW	PCYT1A	PDZD7	PEX19
PGK1	POC1B	PRPF4	RABGGTB	RDH11	RLBP1	RPGRIP1	SGCD
SLC26A4	SPP2	TIMP3	TMEM237	TSPAN12	TUBGCP6	VCAN	ZNF408
ABCC6	ADGRV1	AP3B1	ATF6	BBS4	C10orf11	C8orf37	CCDC28B
CEP78	CIB2	CNGA1	COL18A1	CST3	DHDDS	ELOVL4	EYA1
FZD4	GPR143	GUSB	HMX1	IDUA	INVS	KIF7	LRPAP1
MCOLN1	MPDZ	NMNAT1	OAT	OR2W3	PDCD2	PEX1	PEX2
PGR	POMGNT1	PRPF6	RAX	RDH12	ROM1	RPGRIP1L	SHH
SLC38A8	STRA6	TINF2	TMEM67	TTC21B	TULP1	VHL	ZNF423
ABHD12	ADIPOR1	APOE	ATOH7	BBS5	C1QTNF5	C9	CDH23
CERKL	CLDN19	CNGA3	COL2A1	CTC1	DHX38	ERCC2	EYS
GDF3	GPR179	HARS	HPS1	IFT140	IQCB1	KIZ	LYST
MERTK	MTHFR	NPHP1	OCA2	OTX2	PDE6A	PEX10	PEX26
PHYH	PPT1	PRPF8	RAX2	RDH5	RP1	RS1	SHOX
SLC39A5	TBK1	TLR3	TMEM98	TTC8	TYR	VPS13B	ZNF513
ACBD5	AGBL5	ARL13B	ATXN7	BBS7	C2	CA4	CDH3
CFB	CLN3	CNGB1	COL4A1	CTNNA1	DMD	ERCC3	FAM161A
GDF6	GRK1	HEXA	HPS3	IFT172	ITGA2B	KLHL7	LZTFL1
MFRP	MTTP	NPHP3	OFD1	P3H2	PDE6B	PEX11B	PEX3
PITPNM3	PRCD	PRPH2	RB1	RGR	RP1L1	SAG	SIX5
SLC45A2	TCTN1	TLR4	TOPORS	TTLL5	TYRP1	VSX2	ZNF644
ACO2	AHI1	ARL2BP	BBIP1	BBS9	C21orf2	CABP4	CDHR1
CFH	CLN5	CNGB3	COL9A1	CTSD	DNAJC5	ERCC4	FBLN5
GMPPB	GRM6	HEXB	HPS4	IFT27	ITGB3	LAMA1	MAK
MFSD8	MVK	NPHP4	OPA3	PANK2	PDE6C	PEX12	PEX5
PLA2G5	PRDM13	PRSS56	RBP3	RGS9	RP2	SALL2	SIX6
SLC7A14	TCTN2	TMEM126A	TPP1	TTPA	UNC119	WDPCP	ADAM9
AIPL1	ARL3	BBS1	BEST1	C2orf71	CACNA1F	CEP164	CFHR1
CLN6	CNNM4	COL9A2	CTSF	DRAM2	ERCC5	FBN2	GNAT1
GRN	HFE	HPS5	IMPDH1	ITM2B	LCA5	MAN2B1	MITF
MYO5A	NR2E1	OPN1LW	PAX2	PDE6D	PEX13	PEX5L	PLEKHA1
PROM1	RAB27A	RBP4	RGS9BP	RP9	SCO2	SLC24A1	SNRNP200
TCTN3	TMEM138	TRIM32	TTR	USH1C	WDR19	ADAMTS18	ALDH1A3
ARL6	BBS10	BLOC1S3	C3	CACNA2D4	CEP250	CFHR3	CLN8
CNOT9	CRB1	CX3CR1	DTHD1	ERCC6	FLVCR1	GNAT2	GUCA1A
HGSNAT	HPS6	IMPG1	KCNV2	LRAT	MANBA	MKKS	MYO7A
NR2E3	OPN1MW	PAX6	PDE6G	PEX14	PEX6	PLK4	PRPF3
RAB28	RCBTB1	RHO	RPE65	SDCCAG8	SLC24A5	SOD1	TEAD1
TMEM216	TRNT1	TUB	USH1G	WHRN	-	-	-
